# Supplementary material
Source: publisher figshare collection journal article supplement (https://sage.figshare.com/ndownloader/files/13775942)

## Appendix A. Sample Posted B Grade

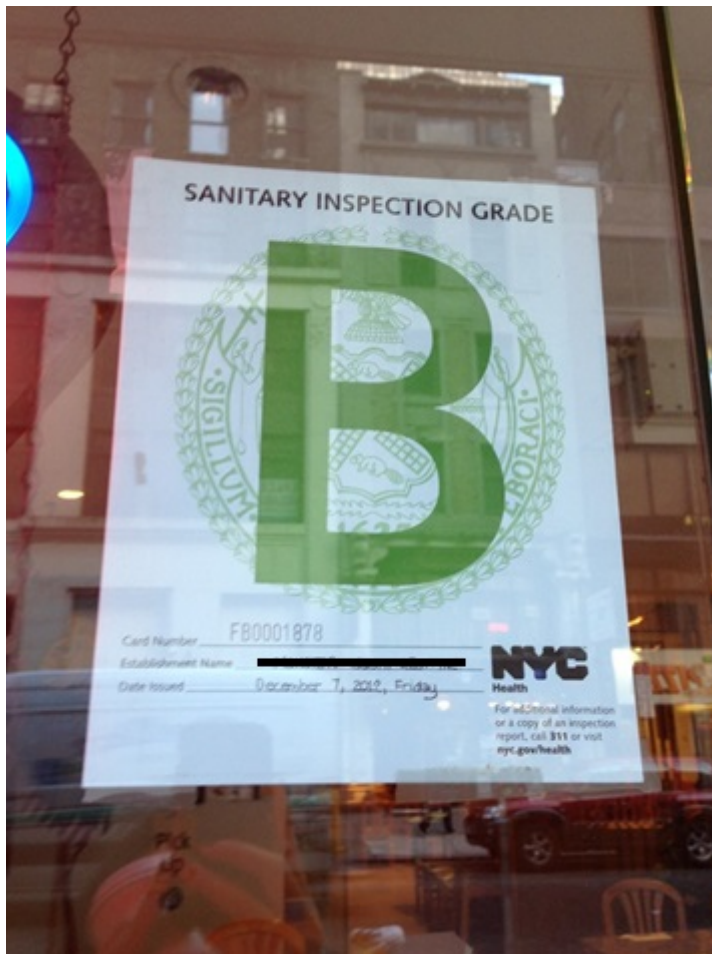

## Appendix B. Regression Results, Impact on Final Inspection Scores

### Pre-Post Estimation

| VARIABLES                      | (1)                | (2)                | (3)                | (4)                | (5)                |
|--------------------------------|--------------------|--------------------|--------------------|--------------------|--------------------|
| Post                           | -7.62***<br>(0.08) | -5.08***<br>(0.16) | -4.25***<br>(0.18) | -4.05***<br>(0.18) | -4.94***<br>(0.29) |
| Post*Linear Trend              | —                  | —                  | —                  | -0.29***<br>(0.03) | -1.10***<br>(0.12) |
| Post*Linear Trend <sup>2</sup> |                    |                    |                    |                    | -.07***<br>(0.01)  |
| Linear Trend                   | —                  | -0.20***<br>(0.01) | -0.18***<br>(0.02) | -0.05*<br>(0.03)   | .68***<br>(0.09)   |
| Linear Trend <sup>2</sup>      |                    |                    |                    |                    | .08***<br>(0.01)   |
| Seasonal FE                    | N                  | Y                  | Y                  | Y                  | Y                  |
| Rest. Char.                    | N                  | Y                  | N                  | N                  | N                  |
| Restaurant FE                  | N                  | N                  | Y                  | Y                  | Y                  |
| Constant                       | 24.55***<br>(0.07) | 13.27***<br>(2.33) | 22.57***<br>(0.12) | 23.12***<br>(0.14) | 24.18***<br>(0.19) |
| Inspections                    | 167,045            | 167,045            | 125,036            | 125,036            | 125,036            |
| Restaurants                    | 40,554             | 40,554             | 20,634             | 20,634             | 20,633             |
| R-squared                      | 0.06               | 0.11               | 0.31               | 0.31               | 0.31               |

Notes: Robust standard errors clustered by restaurant in parentheses. \*\*\* p<0.01, \*\* p<0.05, \* p<0.1.

# Rollout Estimation

|                           | <b>Final Inspection<br/>Score</b> |                      |
|---------------------------|-----------------------------------|----------------------|
| <b>VARIABLES</b>          | <b>(3)</b>                        | <b>(4)</b>           |
| Graded Inspection         | -3.382***<br>(0.181)              | -3.778***<br>(0.160) |
| Quarter Of Grading Policy |                                   |                      |
| 2                         | 1.217***<br>(0.071)               | 1.573***<br>(0.070)  |
| 3                         | 0.574***<br>(0.123)               | 1.233***<br>(0.093)  |
| 4                         | 0.756***<br>(0.150)               | 2.051***<br>(0.113)  |
| Restaurant FE             | N                                 | Y                    |
| Constant                  | 20.219***<br>(0.099)              | 19.791***<br>(0.066) |
| Observations              | 93,788                            | 93,788               |
| R-squared                 | 0.011                             | 0.763                |

Notes: Robust standard errors in parentheses. \*\*\* p<0.01, \*\* p<0.05, \* p<0.1.

Appendix C. NAICS Codes for Establishment Groupings

| <b>"Graded" NYC Restaurants</b> |                                   | <b>Ungraded Suburban Restaurants</b> |                                   | <b>Ungraded Food and Entertainment Establishments</b> |                                                           |
|---------------------------------|-----------------------------------|--------------------------------------|-----------------------------------|-------------------------------------------------------|-----------------------------------------------------------|
| <b>NAICS</b>                    | <b>Business/Service</b>           | <b>NAICS</b>                         | <b>Business/Service</b>           | <b>NAICS</b>                                          | <b>Business/Service</b>                                   |
| 722---                          | Food Services and Drinking Places | 722---                               | Food Services and Drinking Places | 4451--*                                               | Grocery Stores                                            |
| 445299                          | All Other Specialty Food Stores   | 445299                               | All Other Specialty Food Stores   | 4452--*                                               | Specialty Food Stores                                     |
| 445291                          | Baked Goods Stores                | 445291                               | Baked Goods Stores                | 4453--                                                | Beer, Wine, and Liquor Stores                             |
| 445120                          | Convenience Stores                | 445120                               | Convenience Stores                | 7139--                                                | Other Amusement and Recreation Industries                 |
|                                 |                                   |                                      |                                   | 712---                                                | Museums, Historical Sites, and Similar Institutions       |
|                                 |                                   |                                      |                                   | 711--                                                 | Performing Arts, Spectator Sports, and Related Industries |

\*These exclude the NAICS codes included in the restaurant groups, i.e. 445299, 445291, 445120.

Appendix D. Mean Treatment and Control Group Characteristics, Rollout Sample By Quarter

|                         | Jun – Aug, 2010 |           | Sept – Nov, 2010 |           | Dec – Feb, 2011 |           | Mar – May, 2011 |            |
|-------------------------|-----------------|-----------|------------------|-----------|-----------------|-----------|-----------------|------------|
|                         | Treatment       | Control   | Treatment        | Control   | Treatment       | Control   | Treatment       | Control    |
| <u>Characteristics:</u> |                 |           |                  |           |                 |           |                 |            |
| Borough                 |                 |           |                  |           |                 |           |                 |            |
| Manhattan               | 39.6%           | 41.4%     | 40.3%            | 41.8%     | 41.5%           | 40.8%     | 41.6%           | 40.6%      |
| Bronx                   | 9.4             | 9.8       | 10.2             | 9.4       | 10.0            | 9.0       | 9.6             | 9.3        |
| Brooklyn                | 24.8            | 22.8      | 23.2             | 22.6      | 22.9            | 22.6      | 22.9            | 22.0       |
| Queens                  | 25.4            | 21.8      | 23.2             | 21.8      | 22.2            | 22.7      | 22.2            | 23.5       |
| Staten Island           | 0.9             | 4.2       | 3.1              | 4.4       | 3.4             | 4.9       | 3.7             | 4.5        |
| Chain                   | 15.6%           | 12.3%     | 13.6%            | 12.1%     | 13.8%           | 9.9%      | 13.5%           | 7.8%       |
| Workers                 | 5.9             | 7.3       | 6.8              | 7.5       | 7.0             | 7.5       | 7.2             | 6.6        |
| <u>Building:</u>        |                 |           |                  |           |                 |           |                 |            |
| Assessed Value          | 7,322,578       | 9,503,942 | 9,108,455        | 9,557,440 | 9,151,351       | 9,293,507 | 9,061,502       | 10,200,000 |

|                      |                                         |        |                                         |        |                                         |       |                                         |       |
|----------------------|-----------------------------------------|--------|-----------------------------------------|--------|-----------------------------------------|-------|-----------------------------------------|-------|
| Building Type        |                                         |        |                                         |        |                                         |       |                                         |       |
| Office/Commercial    | 9.2%                                    | 7.2%   | 8.0%                                    | 6.9%   | 8.0%                                    | 5.6%  | 7.6%                                    | 4.7%  |
| Retail/Commercial    | 34.7                                    | 34.7   | 35.5                                    | 34.1   | 34.4                                    | 34.8  | 34.5                                    | 34.0  |
| Mixed Retail         | 41.0                                    | 43.3   | 42.7                                    | 43.5   | 43.8                                    | 42.8  | 43.7                                    | 41.8  |
| Other Commercial     | 4.5                                     | 4.5    | 4.0                                     | 4.8    | 4.1                                     | 5.4   | 4.3                                     | 6.4   |
| Residential          | 9.0                                     | 8.2    | 7.9                                     | 8.4    | 8.3                                     | 8.2   | 8.2                                     | 8.7   |
| Government/Public    | 1.6                                     | 2.2    | 1.9                                     | 2.4    | 1.5                                     | 3.4   | 1.7                                     | 4.4   |
| Joint Significance   | F( 12, 937) = 0.80<br>Prob > F = 0.6523 |        | F( 12, 937) = 1.08<br>Prob > F = 0.3779 |        | F( 12, 937) = 0.71<br>Prob > F = 0.7279 |       | F( 11, 937) = 1.39<br>Prob > F = 0.1738 |       |
| Initial Insp. Score  | 23.5                                    | 24.3   | 26.0                                    | 22.9   | 25.0                                    | 21.8  | 24.1                                    | 22.6  |
| Final Insp. Score    | 18.0                                    | 20.1   | 20.9                                    | 19.2   | 20.5                                    | 18.3  | 19.9                                    | 18.8  |
| Fines per Quarter    | \$341                                   | \$250  | \$329                                   | \$202  | \$285                                   | \$175 | \$262                                   | \$170 |
| N                    | 1,560                                   | 17,326 | 7,597                                   | 11,118 | 13,098                                  | 5,755 | 16,514                                  | 2,717 |
| N with Building Code | 1,082                                   | 12,122 | 5,364                                   | 7,817  | 9,333                                   | 4,000 | 11,742                                  | 1,858 |

Notes: Restaurants in the treatment group have their first graded inspection by the end of the fiscal quarter. Control group restaurants do not have a graded

inspection until after the quarter ends. Each observation is a restaurant-quarter.

Appendix E. Regression Results, Impact on Inspection Scores and Fines by Quarter, Rollout Sample

| VARIABLES                 | Initial<br>Inspection | Final<br>Inspection  | Fines                   |
|---------------------------|-----------------------|----------------------|-------------------------|
| Graded Inspection         |                       |                      |                         |
| In Quarter 1:             | 1.897***<br>(0.677)   | -2.137***<br>(0.379) | 153.759***<br>(21.950)  |
| In Quarter 2:             | 0.810***<br>(0.180)   | -2.377***<br>(0.177) | 26.014<br>(17.981)      |
| In Quarter 3:             | -0.693***<br>(0.170)  | -3.616***<br>(0.173) | -147.830***<br>(20.183) |
| In Quarter 4:             | -2.071***<br>(0.182)  | -5.561***<br>(0.216) | -275.079***<br>(18.357) |
| Quarter Of Grading Policy |                       |                      |                         |
| 2                         | 0.074<br>(0.052)      | 1.243***<br>(0.072)  | 130.444***<br>(10.915)  |
| 3                         | -0.133**<br>(0.063)   | 1.179***<br>(0.094)  | 251.674***<br>(19.331)  |
| 4                         | 0.974***<br>(0.076)   | 3.409***<br>(0.151)  | 387.343***<br>(17.798)  |
| Restaurant FE             | Y                     | Y                    | Y                       |
| Constant                  | 25.483***<br>(0.059)  | 19.736***<br>(0.067) | 326.148***<br>(6.021)   |
| Observations              | 122,886               | 93,451               | 94,752                  |
| R-squared                 | 0.849                 | 0.764                | 0.553                   |



Notes: Robust standard errors clustered by restaurant in parentheses. \*\*\*  $p < 0.01$ , \*\*  $p < 0.05$ , \*  $p < 0.1$ . Impact estimates of graded inspections on initial inspection scores, final inspection scores, and fines by quarter. Graded Inspection captures if the most recent inspection occurs after the restaurant grade program begins in July 2010. Quarters Post \* Graded is an interaction of the number of quarters after the grading policy is implemented and share of a quarter a restaurant has been treated. In Quarter 1, 2, 3, 4 are a vector of interactions between the quarter of observation and share of quarter with a graded inspection. Sample includes all restaurants continuously operating from the quarter before grading to five quarters following grading.

# Appendix F. Inspection Scores and Count of Inspections by Treatment Period, Pre-Post Sample

|                  |                           | Inspections:<br>All<br>Operating<br>Restaurants | Inspections:<br>Continuously<br>Operating<br>Restaurants |
|------------------|---------------------------|-------------------------------------------------|----------------------------------------------------------|
| Pre              |                           | 25.07<br>(76,231)                               | 23.50<br>(29,804)                                        |
| Quarters<br>Post |                           |                                                 |                                                          |
| 1-5              | Initial                   | 25.31<br>(41,933)                               | 24.26<br>(17,723)                                        |
|                  | Final Inspection<br>Score | 21.87<br>(27,874)                               | 20.88<br>(11,743)                                        |
| 6-10             | Initial                   | 22.46<br>(46,180)                               | 21.62<br>(18,409)                                        |
|                  | Final Inspection<br>Score | 19.52<br>(29,135)                               | 18.78<br>(11,544)                                        |

Includes pre-adjudicated inspection scores. Mean score shown on top; number of inspections shown parenthetically. Final Inspection Score is the mean restaurant inspection score for final inspections each cycle (all A-graded initial inspections and re-inspections of restaurants that do not get an A grade on initial inspection). Continuously Operating Restaurants are open for every quarter of the sample period.

## Appendix G: Distribution of inspection scores

*Panel A. Final Score Distribution, Second Year of Grading*

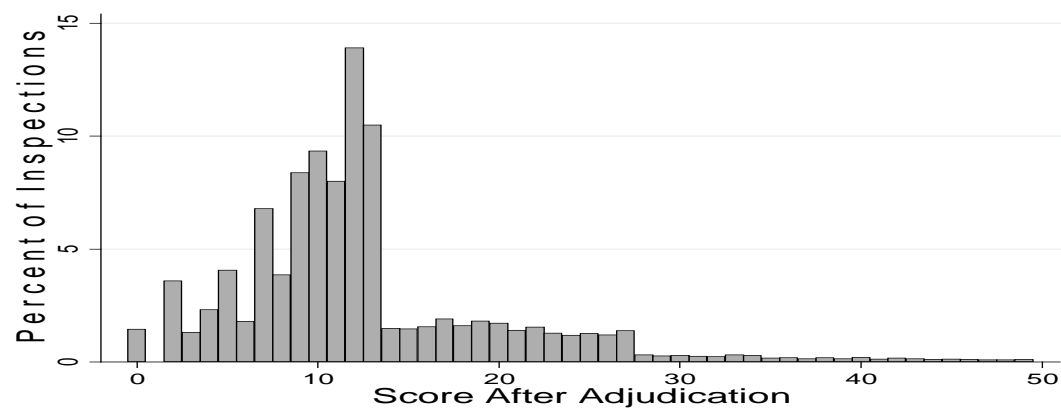

*Panel B. Initial Inspection Score Distribution, Second Year of Grading*

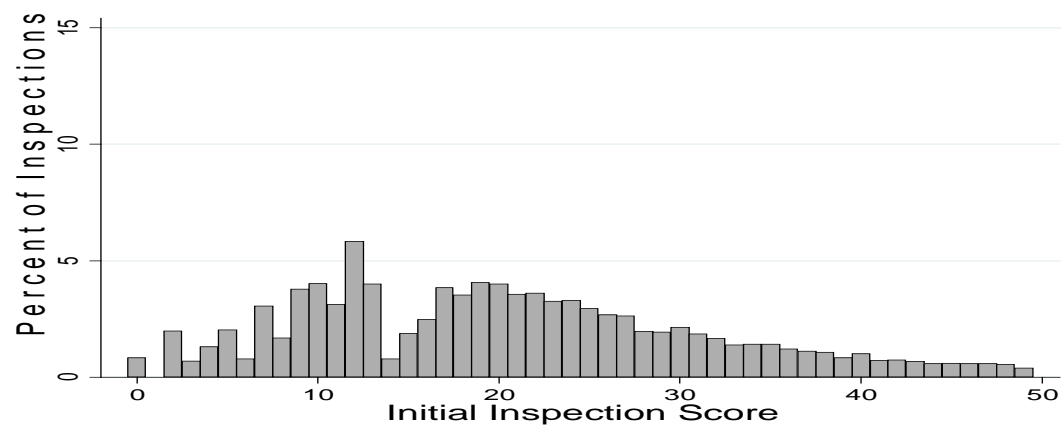

*Panel C. Initial Inspection Score Distribution, Two Years Before Grading*

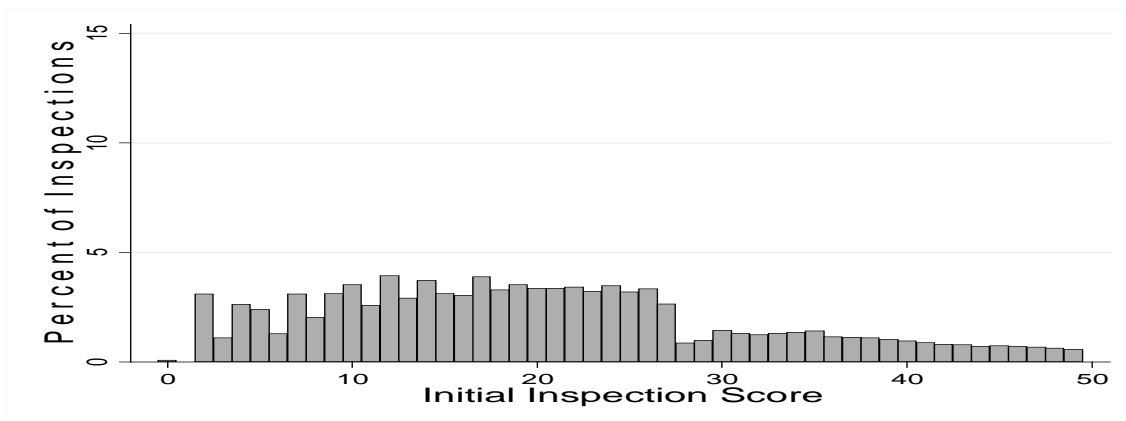

Appendix H. Falsification Test, Inspection Scores, Fines, Revenues, and Sales Taxes, Pre-Post With 1 Year Lead

| VARIABLES        | Initial Score      | Final Score        | Fines                 |
|------------------|--------------------|--------------------|-----------------------|
| Policy Start     |                    |                    |                       |
| Post             | -0.64**<br>(0.31)  | -6.76***<br>(0.27) | -138.92***<br>(15.86) |
| Post*Linear      | -1.38***           | -1.27***           | -98.96***             |
| Trend            | (0.13)             | (0.12)             | (7.01)                |
| One Year Before  |                    |                    |                       |
| Post             | -0.76**<br>(0.38)  | -0.43<br>(0.33)    | 88.83***<br>(20.04)   |
| Post*Linear      | 1.30***            | 1.27***            | 53.91***              |
| Trend            | (0.14)             | (0.12)             | (7.37)                |
| Linear Trend     | -0.34***<br>(0.06) | -0.34***<br>(0.05) | -0.32<br>(2.85)       |
| Seasonal FE      | Y                  | Y                  | Y                     |
| Restaurant/Group | Y                  | Y                  | Y                     |
| FE               |                    |                    |                       |
| Constant         | 23.15***<br>(0.18) | 22.59***<br>(0.15) | 989.98***<br>(9.39)   |
| Inspections      | 109,197            | 120,261            | 159,617               |
| Restaurants      | 20,480             | 20,482             | 20,485                |
| Observations     | --                 | --                 | --                    |
| Rest-Quarters    | --                 | --                 | --                    |
| R-squared        | 0.31               | 0.32               | 0.32                  |

Robust standard errors clustered by restaurant in parentheses. \*\*\*  $p < 0.01$ , \*\*  $p < 0.05$ , \*  $p < 0.1$ .

## Appendix I. Composition of establishments, over time

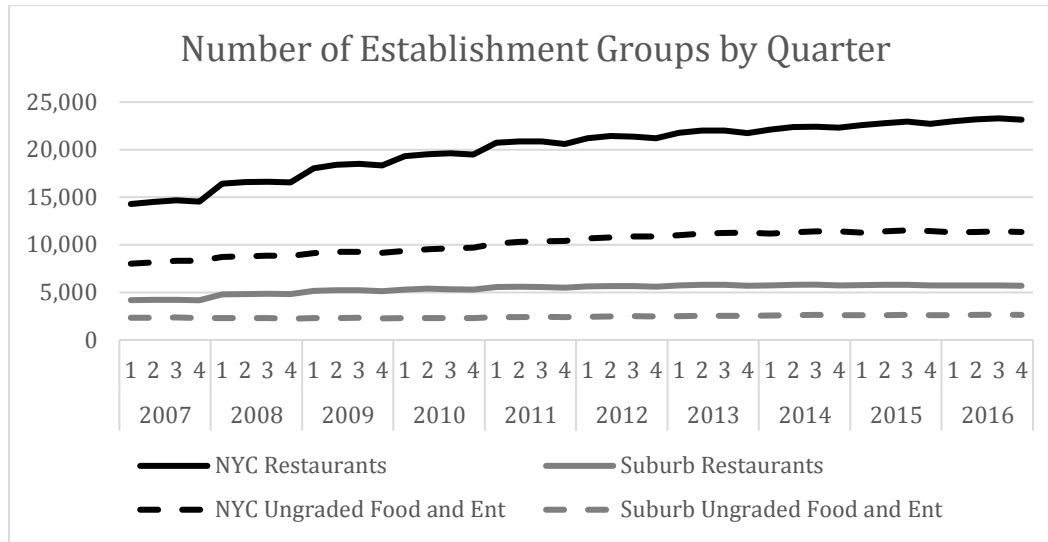

## Appendix J. Average Sales, By Graded and Ungraded Establishments

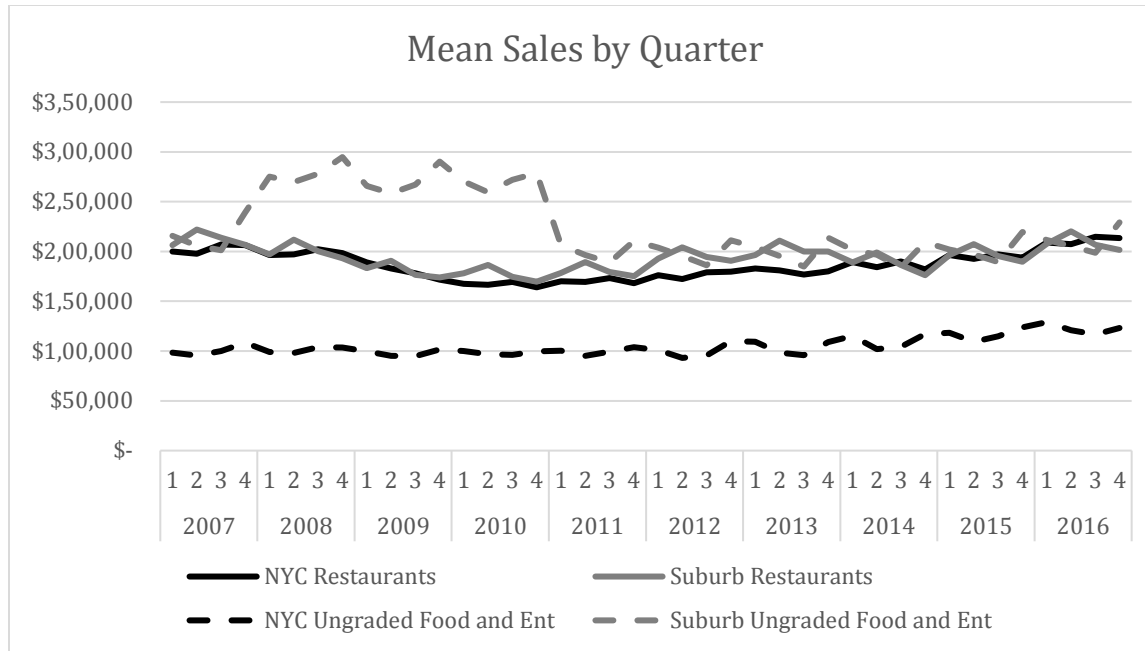

Supplement: Supplementary file 1 [file 13775942]
